# Supplementary material
Source: Springer Nature journal article supplement (https://www.springermedizin.de/resource/supplementary/12889_2011_3847_MOESM1_ESM.pdf/9491938)
Supplement: MOESM1 [file 9491938]

Psychiatrist diagnosis of depression  
In -or-outpatients

Screening by  
research-assistant  
Check inclusion/  
exclusion criteria  
HRSD $\geq$ 14

Informed consent  
+  
Inclusion in EFF-D

T= 0

Biometric values = BV  
Cycle test = CT  
Electronic Questionnaire = EQ  
Blood samples = BS

Blinded randomisation  
by random envelopes

Control Group  
Treatment as usual  
Psychotherapy  
Medication  
Lifestyle  
psychoeducation

Intervention Group  
Treatment as usual  
Psychotherapy  
Medication  
Lifestyle  
psychoeducation

+

T = 3 BV,CT,EQ

T = 6 BV,CT,EQ,BS

T = 12 BV,CT,EQ

20 sessions 1 hr. RT/NW supervised  
20 sessions 1 hr. RT/NW individually  
HR freq. Polar

End of  
Intervention period
